# Supplementary material for: Molecular engineering low-surface energy membranes by grafting perfluoro-tert-butoxy chains containing fluorous silica aerogels
Source: Royal Society of Chemistry journal article supplement (doi:10.1039/d0gc00593b), 2020-01-01
Supplement: d0gc00593b1.pdf [file d0gc00593b1.pdf]

## Supporting Information

### **Molecular engineering low-surface energy membranes by grafting perfluoro-tert-butoxy chains containing fluorosilica aerogels**

Vicki Man-Wai Yim<sup>a, 1</sup>, See-Wing Lo<sup>b, 1</sup>, Bhaskar Jyoti Deka<sup>a</sup>, Jiabin Guo<sup>a</sup>, Jehad A. Kharraz<sup>a</sup>, István T. Horváth<sup>b\*</sup>, and Alicia Kyoungjin An<sup>a\*</sup>

<sup>a</sup> School of Energy and Environment, City University of Hong Kong, Tat Chee Avenue, Kowloon, Hong Kong, China

<sup>b</sup> Department of Chemistry, City University of Hong Kong, Tat Chee Avenue, Kowloon, Hong Kong, China

\*Corresponding authors: István T. Horváth [istvan.t.horvath@cityu.edu.hk](mailto:istvan.t.horvath@cityu.edu.hk) and Alicia Kyoungjin An [alicia.kjan@cityu.edu.hk](mailto:alicia.kjan@cityu.edu.hk)

<sup>1</sup> These authors contributed equally to this work.

### **Supporting Information includes**

Number of pages: S18

Number of Figures: 10

Number of Tables: 4

Number of Method: 1

Number of Videos: 1

|                                                                                                                                                                                                                                                                                                                                                                                                                                                                                                                                                                                                                                                                 |     |
|-----------------------------------------------------------------------------------------------------------------------------------------------------------------------------------------------------------------------------------------------------------------------------------------------------------------------------------------------------------------------------------------------------------------------------------------------------------------------------------------------------------------------------------------------------------------------------------------------------------------------------------------------------------------|-----|
| <b>Figure S1.</b> Schematic of membrane fabrication by electrospraying technique.....                                                                                                                                                                                                                                                                                                                                                                                                                                                                                                                                                                           | S2  |
| <b>Figure S2.</b> Flow diagram of the experimental DCMD process.....                                                                                                                                                                                                                                                                                                                                                                                                                                                                                                                                                                                            | S2  |
| <b>Figure S3.</b> The green perfluoroalkyl groups withdrew the electrons from the attaching carbon, the longer the perfluoroalkyl chains, the stronger the electron-withdrawing effect. The blue carbon in the linear long perfluoroalkyl chain is more electron deficient than black carbon in the short branched perfluoroalkyl groups, since the black carbon has an alkyl chain R which is electron donating.....                                                                                                                                                                                                                                           | S3  |
| <b>Figure S4.</b> XPS analysis of the fluorinated aerogel-coated membrane surfaces: (a) <b>F<sub>1</sub>-SiG50</b> , (b) <b>F<sub>2</sub>-SiG50</b> , and (c) <b>F<sub>3</sub>-SiG50</b> .....                                                                                                                                                                                                                                                                                                                                                                                                                                                                  | S4  |
| <b>Figure S5.</b> Water abrasion test of <b>F<sub>1</sub>-SiG100</b> .....                                                                                                                                                                                                                                                                                                                                                                                                                                                                                                                                                                                      | S5  |
| <b>Figure S6.</b> Photos of membranes' in-air CAs with water, 7% NaCl solution, and 7% NaCl with 0.1 mM SDS solution, and under-water oil CAs with cooking oil.....                                                                                                                                                                                                                                                                                                                                                                                                                                                                                             | S6  |
| <b>Figure S7.</b> Time-dependent UV-vis spectra of <b>F<sub>1</sub>-SiG100</b> 's oil-water separation permeate. ....                                                                                                                                                                                                                                                                                                                                                                                                                                                                                                                                           | S7  |
| <b>Figure S8.</b> Photos of the (A) feed side holding the dyed water, and (B) the permeate side of the <b>F<sub>1</sub>-SiG100</b> membrane after oil-water separation testing.....                                                                                                                                                                                                                                                                                                                                                                                                                                                                             | S8  |
| <b>Figure S9.</b> The re-entrant structures of the modified membranes.....                                                                                                                                                                                                                                                                                                                                                                                                                                                                                                                                                                                      | S9  |
| <b>Figure S10.</b> DCMD performances of the fluorinated aerogel membranes with stepwise SDS addition (0.1 ~ 0.5 mM) in 3.5% NaCl solution: (a) <b>F<sub>1</sub>-SiG25</b> , (b) <b>F<sub>1</sub>-SiG50</b> , (c) <b>F<sub>1</sub>-SiG100</b> , (d) <b>F<sub>2</sub>-SiG25</b> , (e) <b>F<sub>2</sub>-SiG50</b> , (f) <b>F<sub>3</sub>-SiG25</b> , (g) <b>F<sub>3</sub>-SiG50</b> , and (h) C-PVDF membranes. The initial fluxes were observed as $24.29 \pm 0.31$ , $23.94 \pm 0.52$ , $24.25 \pm 0.40$ , $23.89 \pm 0.27$ , $24.12 \pm 0.33$ , $24.39 \pm 0.51$ , $23.76 \pm 0.42$ and $26.47 \pm 0.47$ L m <sup>-2</sup> h <sup>-1</sup> , respectively ..... | S10 |
| <b>Table S1.</b> Surface tension of solvents used in the study.....                                                                                                                                                                                                                                                                                                                                                                                                                                                                                                                                                                                             | S11 |
| <b>Table S2.</b> The BET surface area, porosity and surface free energy of membranes.....                                                                                                                                                                                                                                                                                                                                                                                                                                                                                                                                                                       | S12 |
| <b>Table S3.</b> Oil/water separation measurements and the oil adsorption of <b>F<sub>1</sub>-SiG100</b> membrane.....                                                                                                                                                                                                                                                                                                                                                                                                                                                                                                                                          | S13 |
| <b>Table S4.</b> Comparison of DCMD performance against low surface tension feed. ....                                                                                                                                                                                                                                                                                                                                                                                                                                                                                                                                                                          | S14 |
| <b>Method S1.</b> Working principle, mathematical models and detailed procedure of measuring membranes surface roughness using optical surface profiler (Wyko NT9300, Veeco).....                                                                                                                                                                                                                                                                                                                                                                                                                                                                               | S15 |
| <b>Video S1.</b> Superoliphilicity of <b>F<sub>1</sub>-SiG100</b> by dropping chloroform.....                                                                                                                                                                                                                                                                                                                                                                                                                                                                                                                                                                   | S17 |

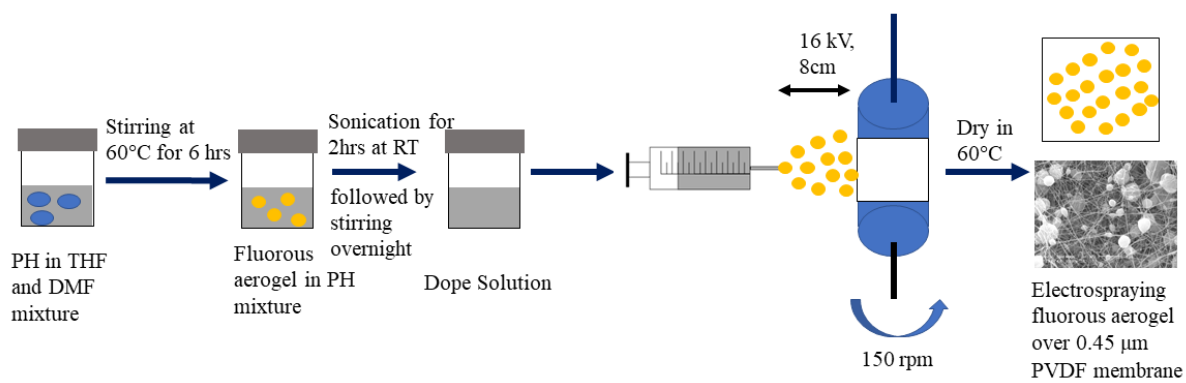

**Figure S1.** Schematic of membrane fabrication by electrospaying technique.

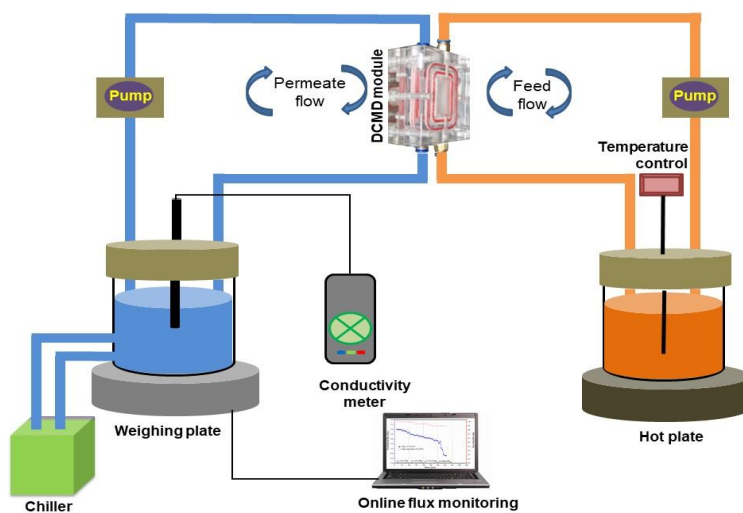

**Figure S2.** Flow diagram of the experimental DCMD process.

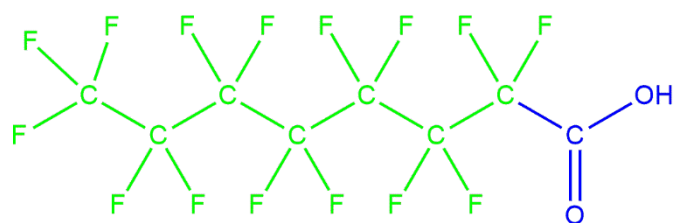

Linear long perfluoroalkyl chain

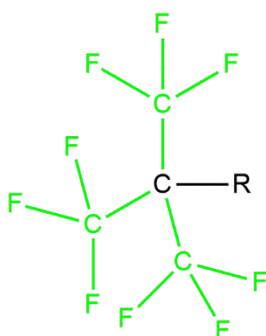

Short branched perfluoroalkyl group

**Figure S3.** The green perfluoroalkyl groups withdrew the electrons from the attaching carbon, the longer the perfluoroalkyl chains, the stronger the electron-withdrawing effect. The blue carbon in the linear long perfluoroalkyl chain is more electron deficient than black carbon in the short branched perfluoroalkyl groups, since the black carbon has an alkyl chain R which is electron donating

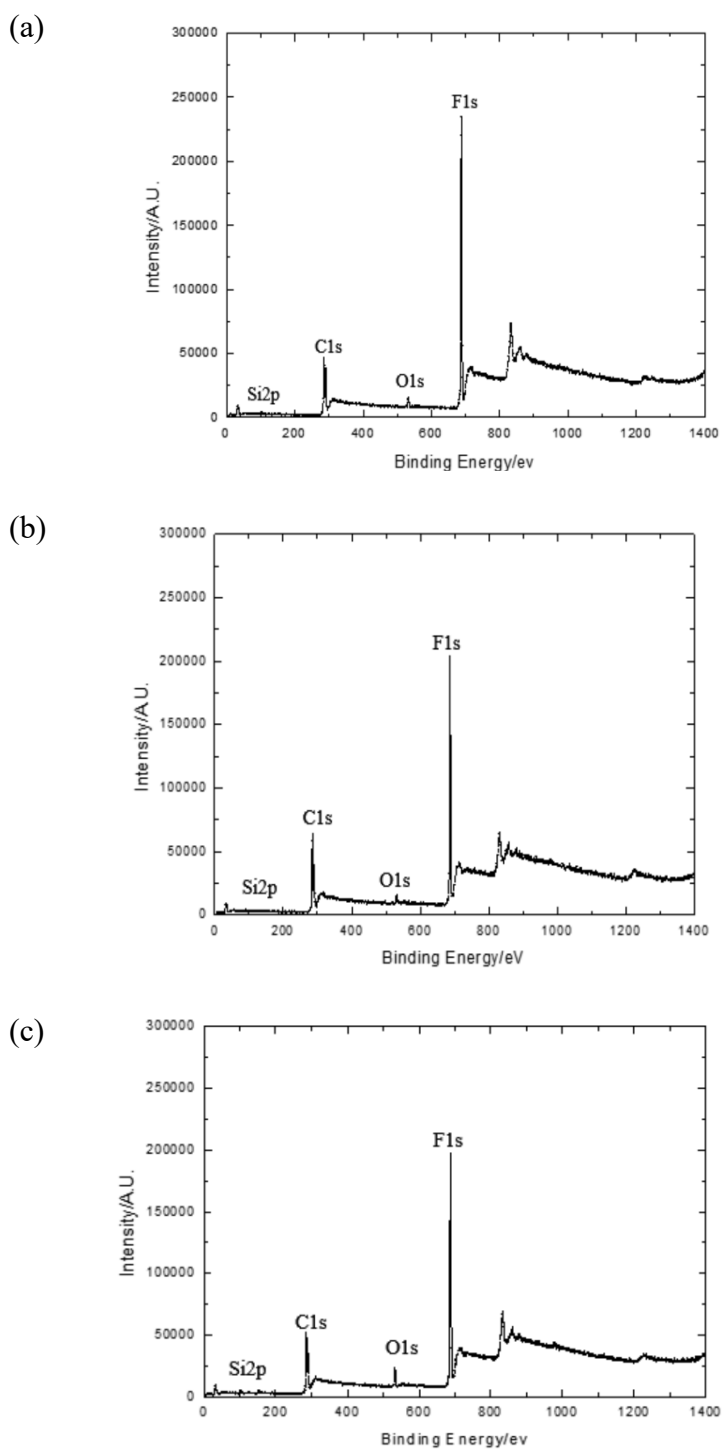

**Figure S4.** XPS analysis of the fluorinated aerogel-coated membrane surfaces: (a) **F<sub>1</sub>-SiG50**, (b) **F<sub>2</sub>-SiG50**, and (c) **F<sub>3</sub>-SiG50**.

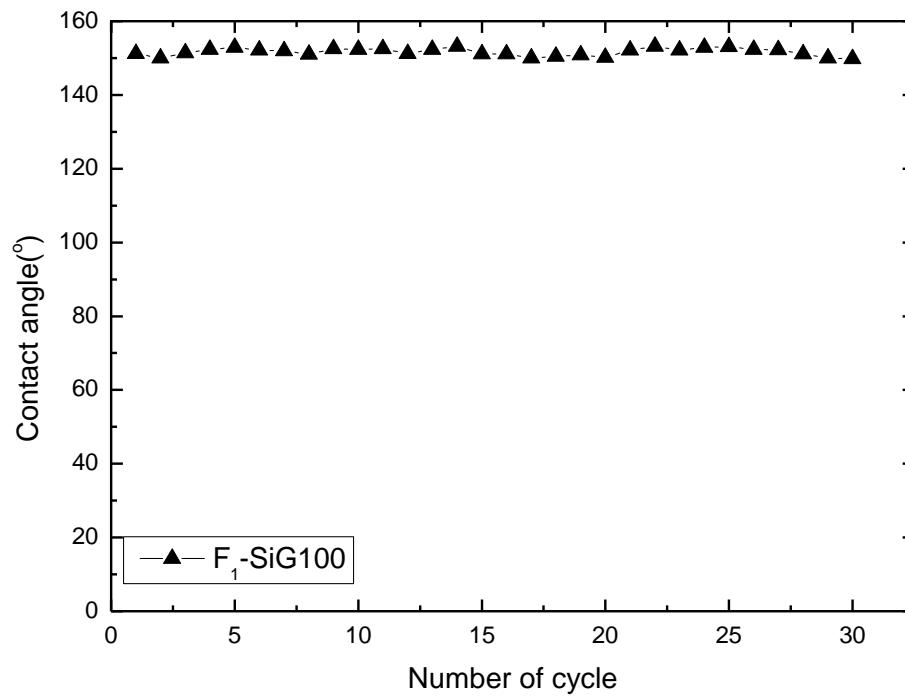

**Figure S5.** Water abrasion test of F<sub>1</sub>-SiG100.

|                        | In-air CA                                                                           |                                                                                     |                                                                                      | Under-water CA                                                                        |
|------------------------|-------------------------------------------------------------------------------------|-------------------------------------------------------------------------------------|--------------------------------------------------------------------------------------|---------------------------------------------------------------------------------------|
|                        | Water                                                                               | 7% NaCl solution                                                                    | 7% NaCl and 0.1 mM SDS solution                                                      | Cooking oil                                                                           |
| F <sub>1</sub> -SiG25  | 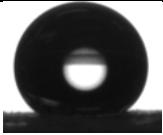   |    |    |    |
| F <sub>1</sub> -SiG50  |    |    |    |                                                                                       |
| F <sub>1</sub> -SiG100 |    |    |    |                                                                                       |
| F <sub>2</sub> -SiG25  |   |   |   |  |
| F <sub>2</sub> -SiG50  |  |  |  |                                                                                       |
| F <sub>3</sub> -SiG25  |  |  |  |                                                                                       |
| F <sub>3</sub> -SiG50  |  |  |  |                                                                                       |
| PVDF                   |  |  |  |                                                                                       |

**Figure S6.** Photos of membranes' in-air CAs with water, 7% NaCl solution, and 7% NaCl with 0.1 mM SDS solution, and under-water oil CAs with cooking oil.

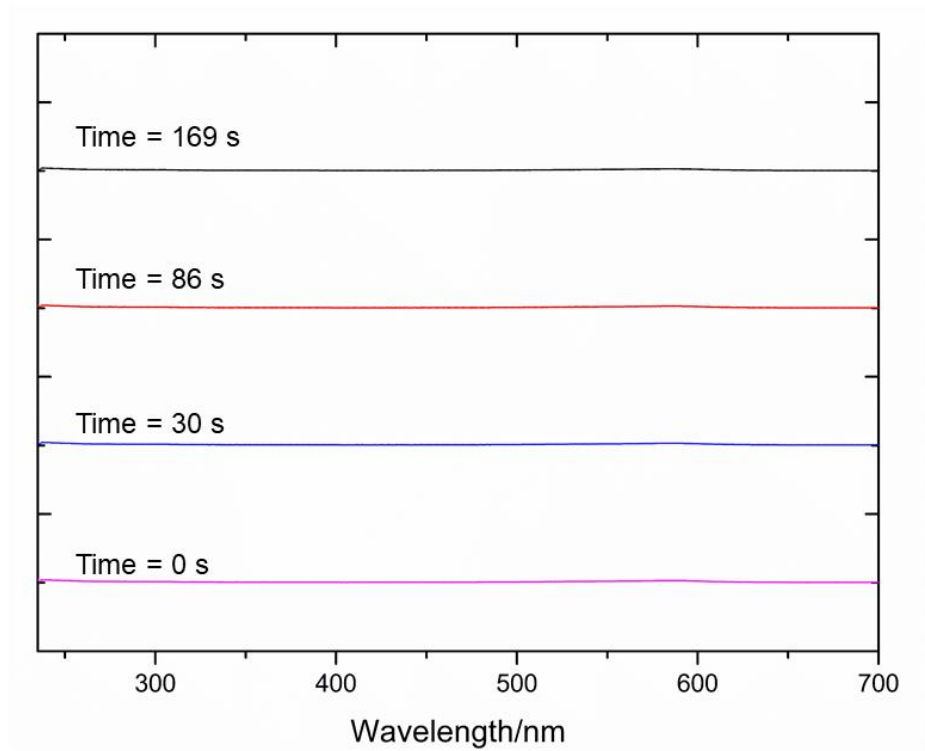

**Figure S7.** Time-dependent UV-vis spectra of F<sub>1</sub>-SiG100's oil-water separation permeate.



A

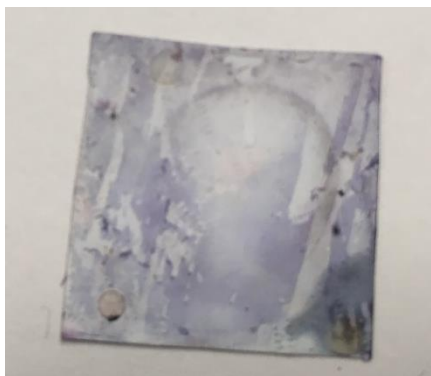

B

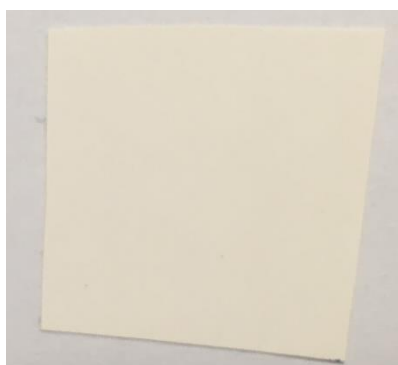

**Figure S8.** Photos of the (A) feed side holding the dyed water, and (B) the permeate side of the F<sub>1</sub>-SiG100 membrane after oil-water separation testing.

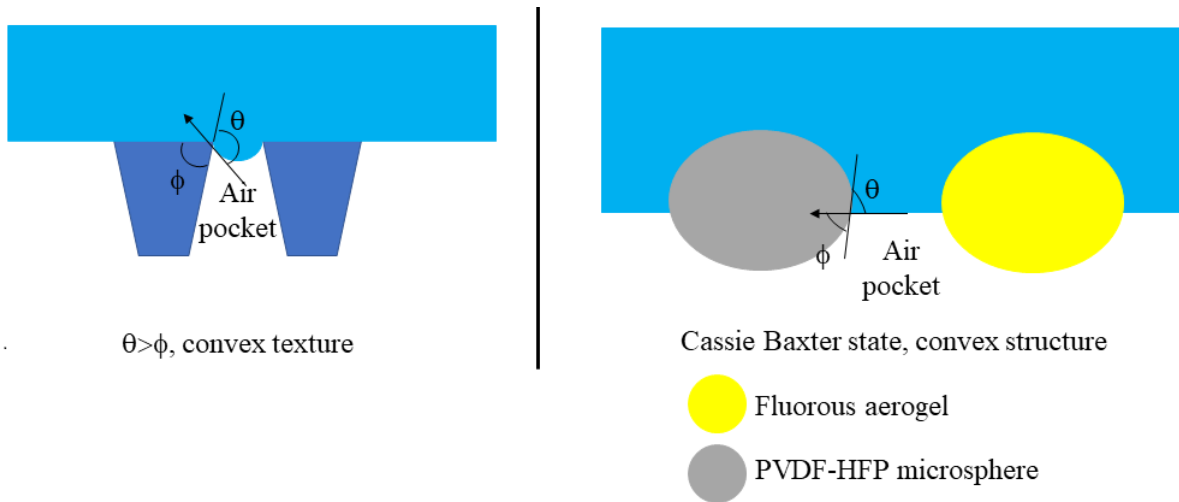

**Figure S9.** The re-entrant structures of the modified membranes.

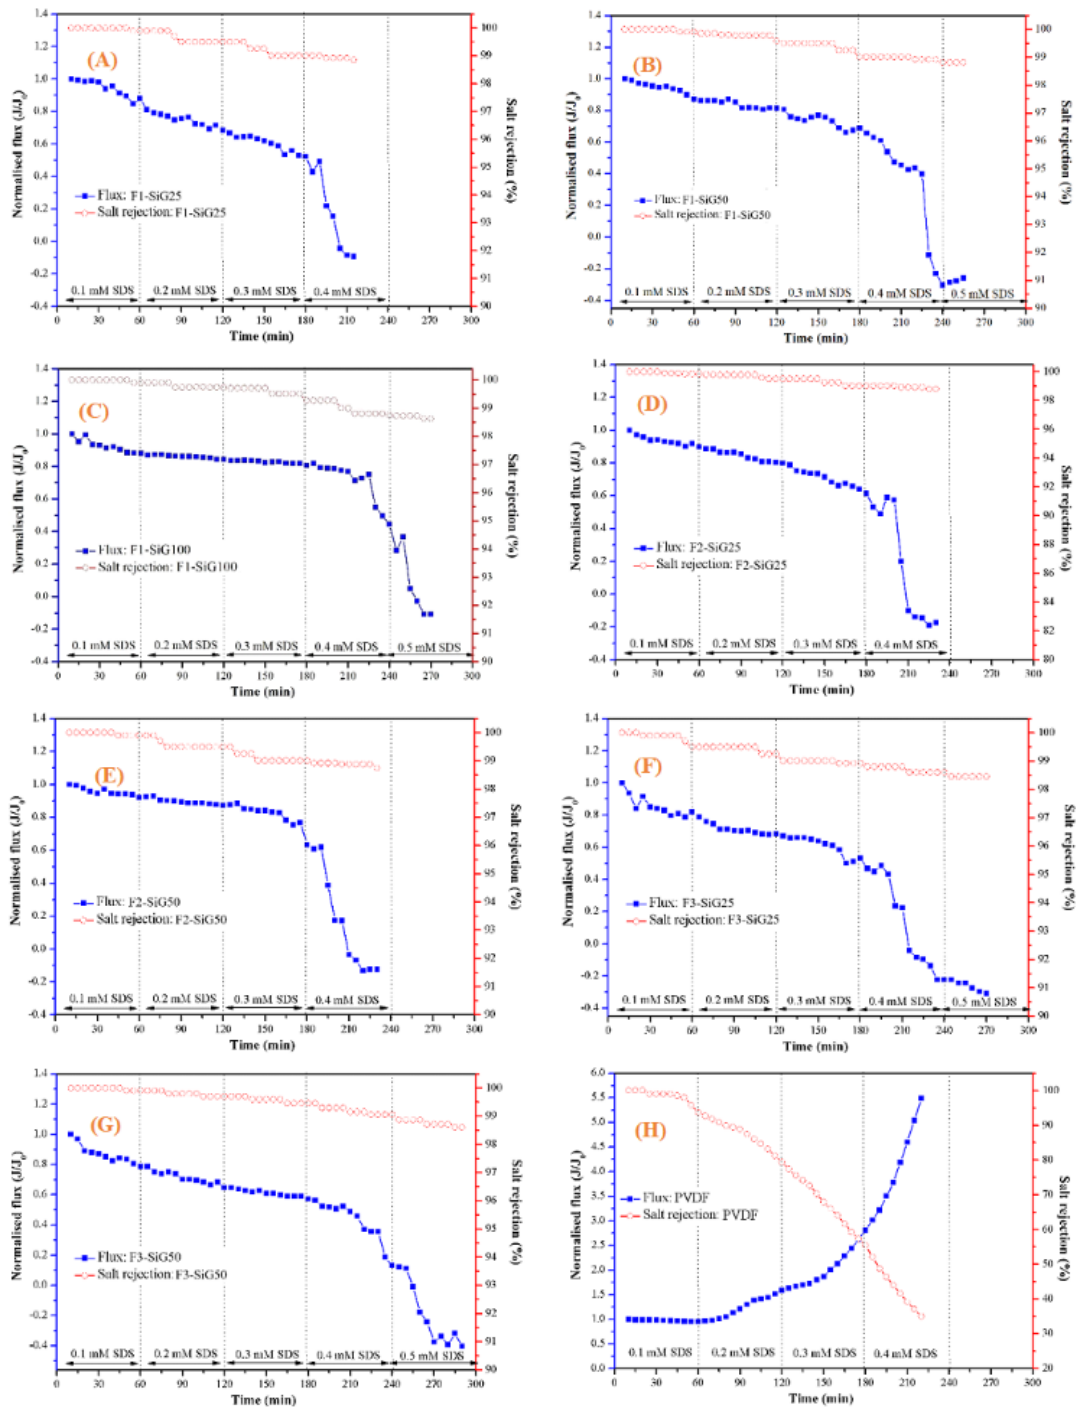

**Figure S10.** DCMD performances of the fluorinated aerogel membranes with stepwise SDS addition (0.1 ~ 0.5 mM) in 3.5% NaCl solution: (a) **F<sub>1</sub>-SiG25**, (b) **F<sub>1</sub>-SiG50**, (c) **F<sub>1</sub>-SiG100**, (d) **F<sub>2</sub>-SiG25**, (e) **F<sub>2</sub>-SiG50**, (f) **F<sub>3</sub>-SiG25**, (g) **F<sub>3</sub>-SiG50**, and (h) C-PVDF membranes. The initial fluxes were observed as  $24.29 \pm 0.31$ ,  $23.94 \pm 0.52$ ,  $24.25 \pm 0.40$ ,  $23.89 \pm 0.27$ ,  $24.12 \pm 0.33$ ,  $24.39 \pm 0.51$ ,  $23.76 \pm 0.42$  and  $26.47 \pm 0.47$  L m<sup>-2</sup> h<sup>-1</sup>, respectively

**Table S1.** Surface tension of solvents used in the study.

| Solvents      | Surface tension( $\sigma_L$ ) at room temperature /mN m <sup>-1</sup> | Dispersive component ( $\sigma_L^D$ ) /mN m <sup>-1</sup> | Polar component ( $\sigma_L^P$ ) /mN m <sup>-1</sup> |
|---------------|-----------------------------------------------------------------------|-----------------------------------------------------------|------------------------------------------------------|
| Water         | 72.8                                                                  | 21.8                                                      | 51.0                                                 |
| Diiodomethane | 50.8                                                                  | 50.8                                                      | 0.0                                                  |

**Table S2.** The BET surface area, porosity and surface free energy of membranes.

| Type of membrane       | BET surface area (m <sup>2</sup> g <sup>-1</sup> ) | Porosity (%) | Surface free energy (mN m <sup>-1</sup> ) | Water contact angle (°) |
|------------------------|----------------------------------------------------|--------------|-------------------------------------------|-------------------------|
| F <sub>1</sub> -SiG25  | 4.54                                               | 76.71 ± 0.56 | 2.16 ± 0.25                               | 139.7±1.4               |
| F <sub>1</sub> -SiG50  | 5.34                                               | 78.18 ± 0.56 | 1.93 ± 0.27                               | 141.5±2.0               |
| F <sub>1</sub> -SiG100 | 9.25                                               | 78.65 ± 0.60 | 0.82 ± 0.17                               | 151.2±1.0               |
| F <sub>2</sub> -SiG25  | 9.85                                               | 75.01 ± 0.56 | 2.29 ± 0.23                               | 138.0±1.0               |
| F <sub>2</sub> -SiG50  | 11.02                                              | 76.22 ± 0.45 | 1.89 ± 0.17                               | 138.2±0.4               |
| F <sub>3</sub> -SiG25  | 10.14                                              | 73.69 ± 0.67 | 2.93 ± 0.49                               | 131.6±2.6               |
| F <sub>3</sub> -SiG50  | 14.49                                              | 74.91 ± 0.65 | 1.99 ± 0.25                               | 134.1±2.3               |
| C-PVDF                 | 3.60                                               | 64.11 ± 0.33 | 29.01 ± 0.71                              | 119.0±3.1               |

**Table S3.** Oil/water separation measurements and the oil adsorption of F<sub>1</sub>-SiG100 membrane

|                    | Absorption capacity (g g <sup>-1</sup> ) | Flux (L m <sup>-2</sup> h <sup>-1</sup> ) |
|--------------------|------------------------------------------|-------------------------------------------|
| 1 <sup>st</sup>    | 3.3                                      | 647.4                                     |
| 2 <sup>nd</sup>    | 3.0                                      | 687.9                                     |
| 3 <sup>rd</sup>    | 3.1                                      | 659.1                                     |
| Average            | 3.2                                      | 664.8                                     |
| Standard deviation | 0.2                                      | 20.8                                      |

For oil//water separation, gravity driven based separation has been adopted, using chloroform (colourless) and water (dyed in blue colour).

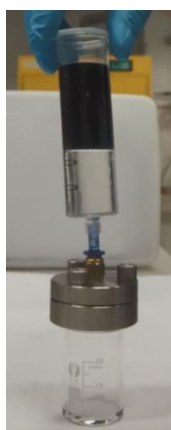

At time 3 s

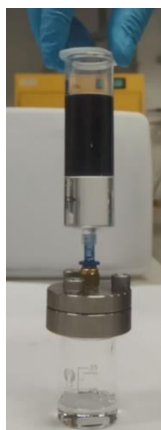

At time 30 s

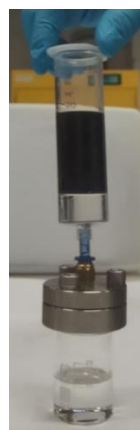

At time 86 s

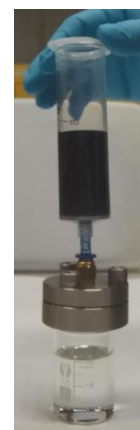

At time 169 s

**Table S4.** Comparison of DCMD performance against low surface tension feed.

| Materials                                    | Types                           | Feed concentration           | Water flux/LMH | Duration  | Feed temperature/°C | Permeate temperature/°C | Rejection |
|----------------------------------------------|---------------------------------|------------------------------|----------------|-----------|---------------------|-------------------------|-----------|
| PDMS/aerogel/PVDF <sup>1</sup>               | Electrospraying                 | 3.5% wt% NaCl and 0.1 mM SDS | 20             | 8 hours   | 60                  | 20                      | 99.99%    |
| FTCS/PVDF <sup>2</sup>                       | Electrospinning and dip-coating | 3.5% wt% NaCl and 0.1 mM SDS | 10             | 6 hours   | 60                  | 20                      | 99.99%    |
| FAS17/PVDF-HFP <sup>3</sup>                  | Electrospinning and dip coating | 3.5% wt% NaCl and 0.1 mM SDS | 19             | 2 hours   | 60                  | 20                      | 99.99%    |
| PTFE-PVDF <sup>4</sup>                       | Commercial (Minglie Membrane)   | 3.5% wt% NaCl and 0.3 mM SDS | 11.8           | 50 hours  | 53                  | 20                      | 99.99%    |
| FAS17/ZnO/glass fibers membrane <sup>5</sup> | Polymer coating                 | 1 M NaCl and 0.3 mM SDS      | 11.4           | 8 hours   | 60                  | 20                      | 99.99%    |
| F <sub>1</sub> -SiG100 (This study)          | Electrospraying                 | 3.5% wt% and 0.1 mM SDS      | 17.3           | 240 hours | 60                  | 20                      | 99.99%    |

**Method S1.** Working principle, mathematical models and detailed procedure of measuring membranes surface roughness using optical surface profiler (Wyko NT9300, Veeco).

In optical surface profiler, the calculated average surface roughness,  $R_a$ , and the root mean square (RMS) roughness,  $R_{RMS}$ , are defined as the average height calculated over the entire measured length or area, and as the average between the height deviations and the mean surface taken over the evaluation area, respectively.  $R_a$  and  $R_{RMS}$  are calculated based on the (ANSI B46.1 2009) standard according to Equation (1) and Equation (2) below, respectively:

$$R_a = \frac{1}{MN} \sum_{j=1}^N \sum_{i=1}^M |Z_{ij}| \quad (\text{Equation 1})$$

$$R_{RMS} = \sqrt{\frac{1}{MN} \sum_{j=1}^N \sum_{i=1}^M Z^2(x_i, y_i)} \quad (\text{Equation 2})$$

Equations 1 and 2 apply for a three-dimensional measurement where M and N are the number of data points in X and Y, and Z is the surface height relative to the mean plane. The RMS roughness is representative of the standard deviation of the profile heights of the measured surface <sup>6</sup>.

The working principle of surface profiling by White Light Interferometry (WLI) is shown in Figure 1 below, and can be briefly explained as follows:

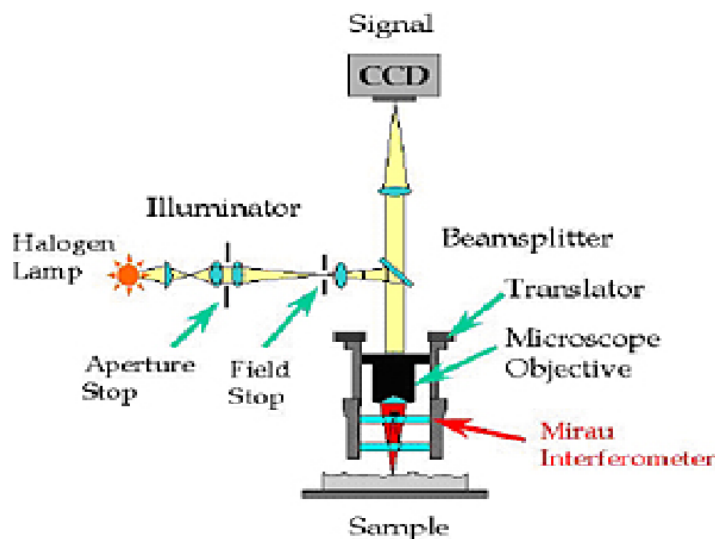

Figure 1. Typical microscope based white light interferometer<sup>7</sup>.



Firstly, a white light from the illuminator generated by a halogen lamp travels through the aperture stop and field stop. The aperture stop controls the light focus while the field stop controls the field-of-view (FOV) on the charged-coupled-device (CCD) camera. The light is then reflected down to the interferometer (interfaced with a translator, reference mirror, and a microscope objective) by a beam splitter. Once the light reaches the microscope objective, another beam splitter separates the light into two beams. One beam (the reference beam) reflects from a super smooth reference mirror inside the objective, while the other (the test beam) reflects from the surface of the sample and back to the objective. If the surface of the sample is in focus, the two light beams will recombine to create bright and dark bands called “fringes” that represent the topography of the object and can be used to gauge the roughness of the surface. Throughout the scan, a series of intensity of data frames, which are shown as interferograms, is recorded by the CCD detector and the data frame is forwarded to a computer for processing. Finally, these frames are analysed using various interferometric phase mapping programs, to determine the height of each point on the surface<sup>7</sup>.

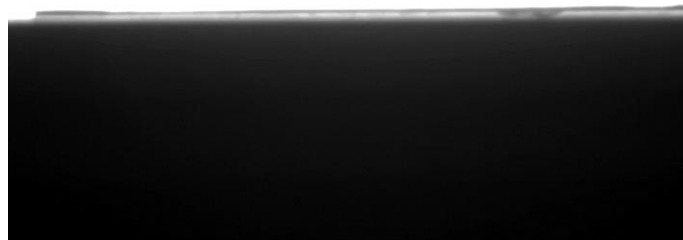

**Video S1.** Superoliphilicity of F1-SiG100 by dropping chloroform.

[https://portland-my.sharepoint.com/:v/g/personal/mwyim4-c\\_ad\\_cityu\\_edu\\_hk/EVVocMQPe6hCrVJNL1ER63ABBEpswtUMU7pnShLDT0XMkw?e=mfK3Ed](https://portland-my.sharepoint.com/:v/g/personal/mwyim4-c_ad_cityu_edu_hk/EVVocMQPe6hCrVJNL1ER63ABBEpswtUMU7pnShLDT0XMkw?e=mfK3Ed)

## References

- 1 E.-J. Lee, B. J. Deka and A. K. An, *J. Memb. Sci.*, 2019, **573**, 570–578.
- 2 L. Deng, H. Ye, X. Li, P. Li, J. Zhang, X. Wang, M. Zhu and B. S. Hsiao, *Sep. Purif. Technol.*, 2018, **206**, 14–25.
- 3 X. An, Z. Liu and Y. Hu, *Desalination*, 2018, **432**, 23–31.
- 4 D. Hou, Z. Yuan, M. Tang, K. Wang and J. Wang, *J. Memb. Sci.*, 2020, **595**, 117495.
- 5 L. H. Chen, A. Huang, Y. R. Chen, C. H. Chen, C. C. Hsu, F. Y. Tsai and K. L. Tung, *Desalination*, 2018, **428**, 255–263.
- 6 S. E. Cross, J. Kreth, R. P. Wali, R. Sullivan, W. Shi and J. K. Gimzewski, *Dent. Mater.*, 2009, **5**, 1517–1526.
- 7 S. C. H. Thian, W. Feng, Y. S. Wong, J. Y. H. Fuh, H. T. Loh, K. H. Tee, Y. Tang and L. Lu, *J. Phys. Conf. Ser.*, 2007, **48**, 1435–1446.
